# Supplementary material for: Gold nanoparticles coated with a polydopamine layer and dextran brush surface for diagnosis and highly efficient photothermal therapy of tumors
Source: Royal Society of Chemistry journal article supplement (doi:10.1039/c6ra02684b), 2016-01-01
Supplement: c6ra02684b1.pdf [file c6ra02684b1.pdf]

## Supplementary information

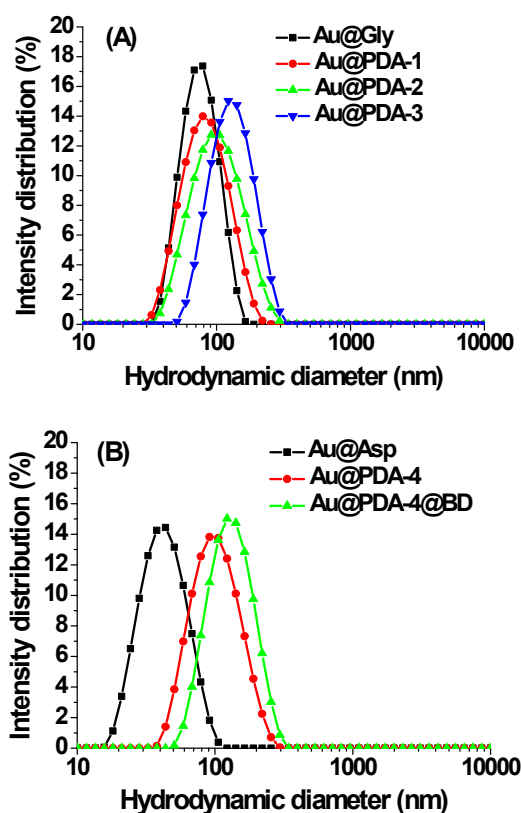

**Fig. S1.** Size distributions of various nanoparticles measured by dynamic light scattering.

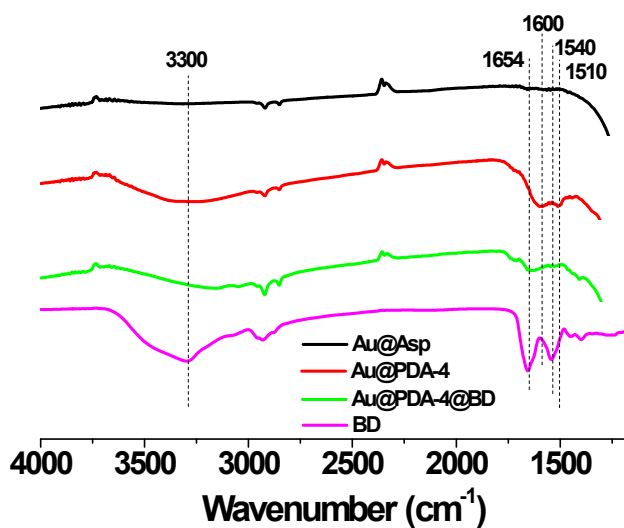

**Fig. S2.** FTIR spectra of Au@Asp, Au@PDA-4 and Au@PDA-4@BD nanoparticles and BD conjugate.
